# Supplementary material
Source: PubMed Central journal article supplement (PMC5455996)

A

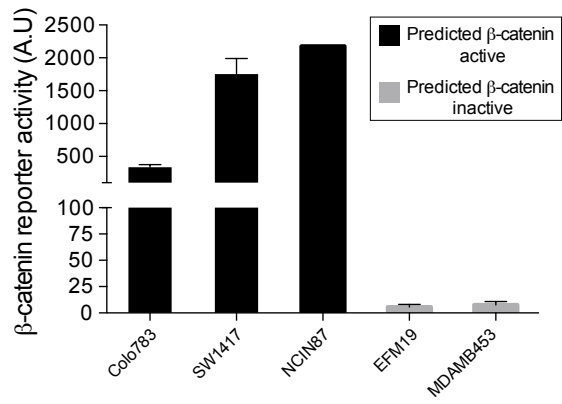

B

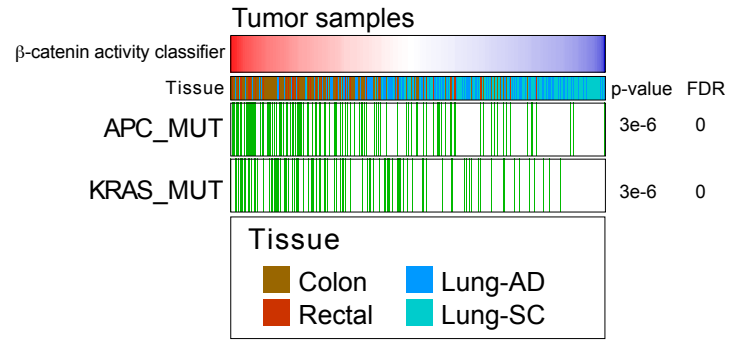

Supplement: NIHMS849497-supplement-Supp_Fig_1.pdf [file NIHMS849497-supplement-Supp_Fig_1.pdf]

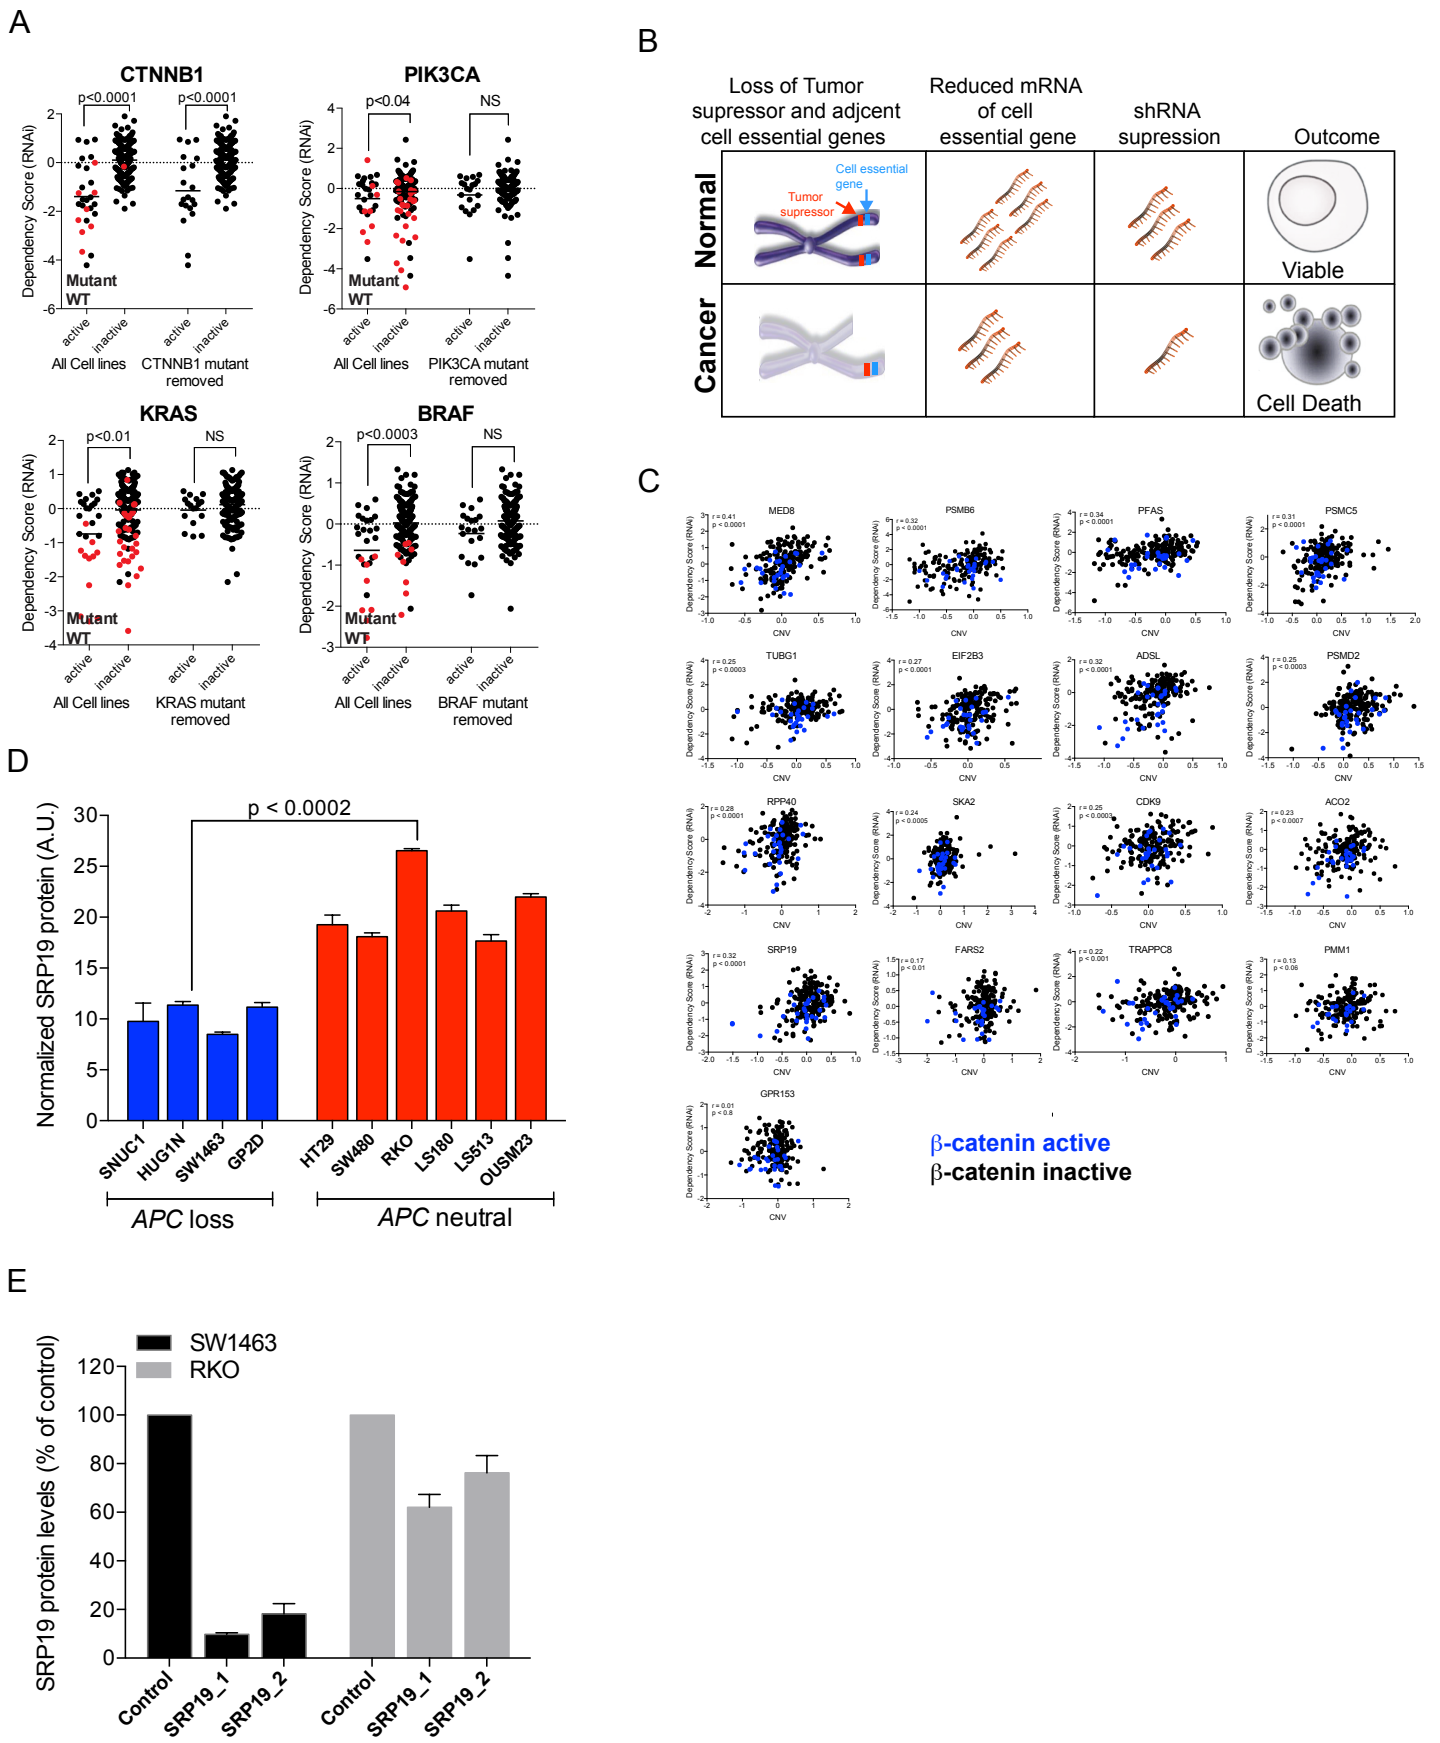

Supplement: NIHMS849497-supplement-Supp_Fig_2.pdf [file NIHMS849497-supplement-Supp_Fig_2.pdf]

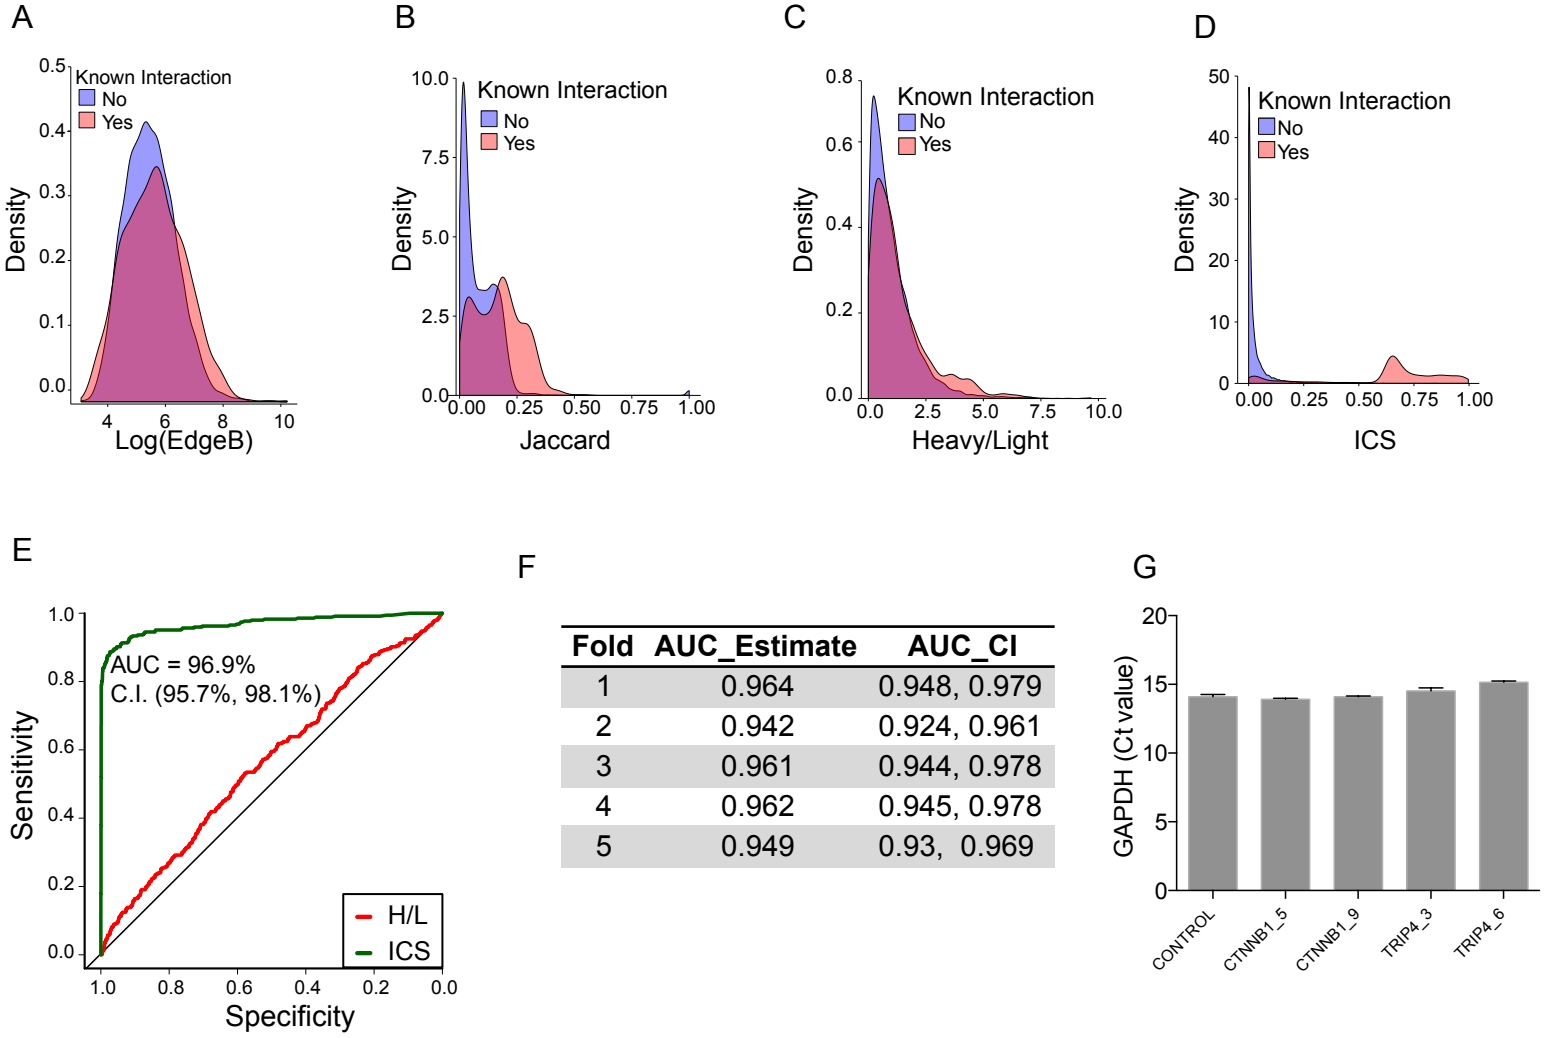

Supplement: NIHMS849497-supplement-Supp_Fig_4.pdf [file NIHMS849497-supplement-Supp_Fig_4.pdf]
